# Supplementary material for: How is CO2 hydrogenated to ethanol on metal–organic framework HKUST-1? Microscopic insights from density-functional theory calculations
Source: Royal Society of Chemistry journal article supplement (doi:10.1039/d4ta08052a), 2024-12-31
Supplement: d4ta08052a1.pdf [file d4ta08052a1.pdf]

## Electronic Supplementary Information

### How is CO<sub>2</sub> hydrogenated to ethanol on metal–organic framework HKUST-1? Microscopic insights from density-functional theory calculations

Bikun Zhang and Jianwen Jiang\*

Department of Chemical and Biomolecular Engineering, National University of Singapore, 117576, Singapore

\*Email: chejj@nus.edu.sg

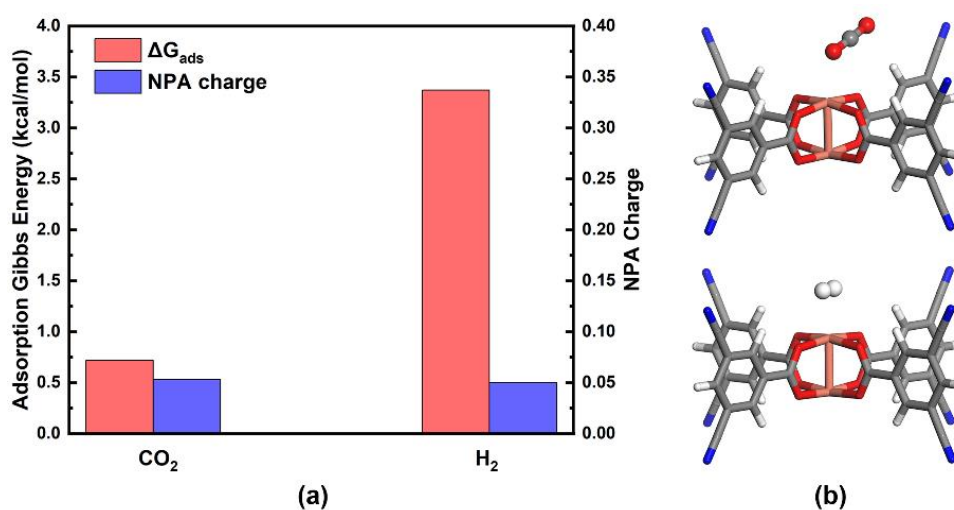

Fig. S1 (a) Adsorption Gibbs energies, NPA charges and (b) structures of CO<sub>2</sub> and H<sub>2</sub> on o\_PW.

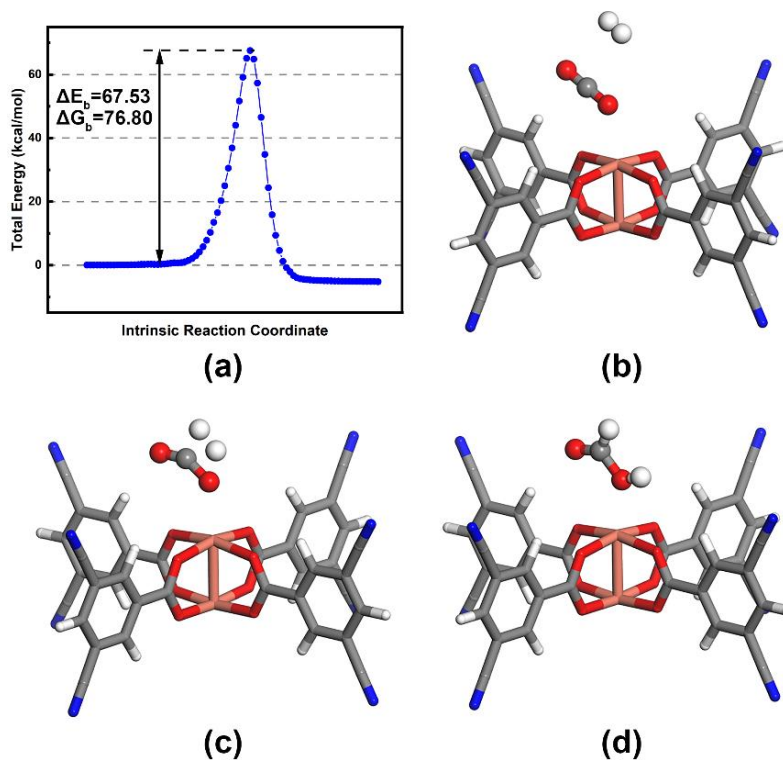

**Fig. S2** (a) Total energy versus intrinsic reaction coordinate; structures of (b) initial state, (c) transition state and (d) final state of  $\text{CO}_2 + \text{H}_2 \rightarrow \text{HCOOH}$  on  $o\_PW$ .

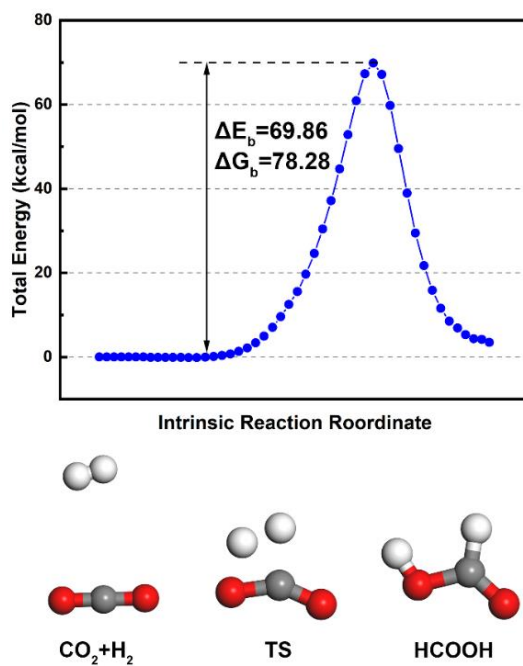

**Fig. S3** (a) Total energy versus intrinsic reaction coordinate of  $\text{CO}_2 + \text{H}_2 \rightarrow \text{HCOOH}$  in the gas phase and (b) structures of  $\text{CO}_2 + \text{H}_2$ , transition state (TS) and HCOOH.

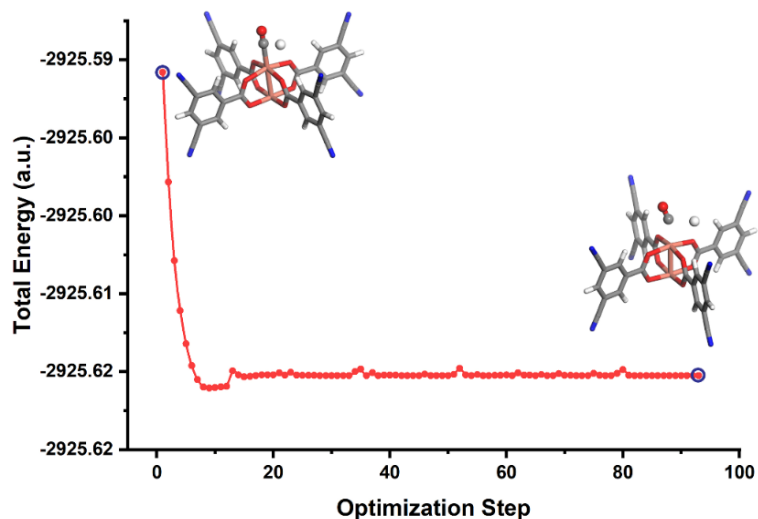

**Fig. S4** Total energy evolution during transition state search for \*CO hydrogenation on o\_PW, with the structures of the first and last step shown.

One isolated H atom was put near \*CO during transition state search between \*CO + H and \*CHO/\*COH. However, the calculation ended with H atom moving away from \*CO, indicating that CO strongly repels H atom.

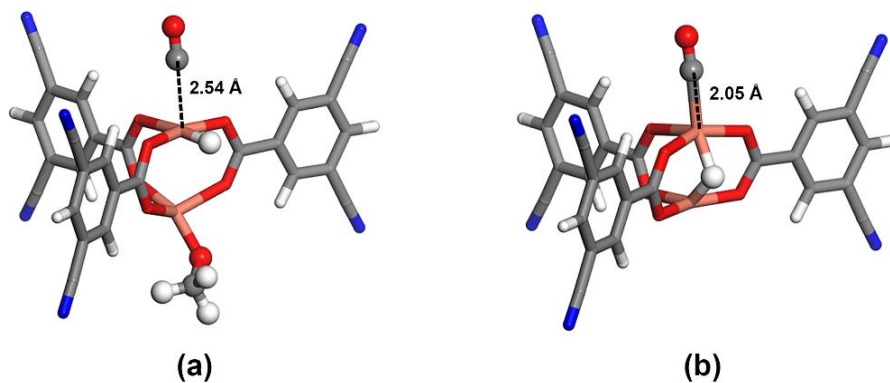

**Fig. S5** \*H + \*CO co-adsorption structures on (a) CH<sub>3</sub>O\_PW and (b) d\_PW.

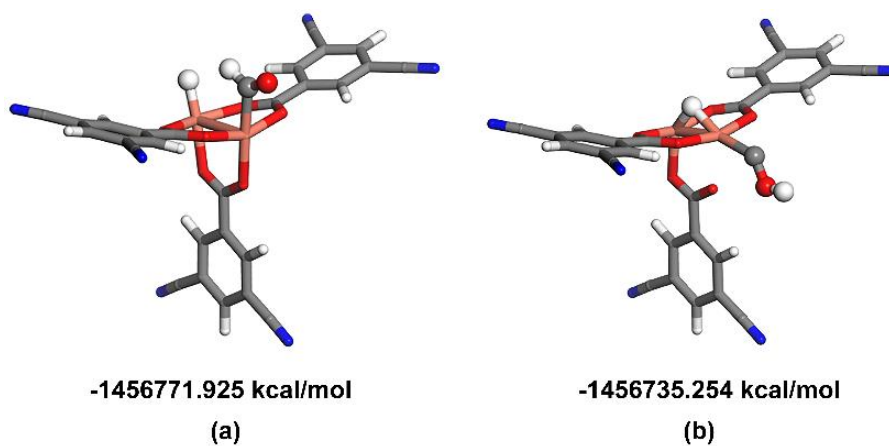

**Fig. S6** Structures and total energies of (a) \*CHO + \*H and (b) \*COH + \*H on d\_PW.

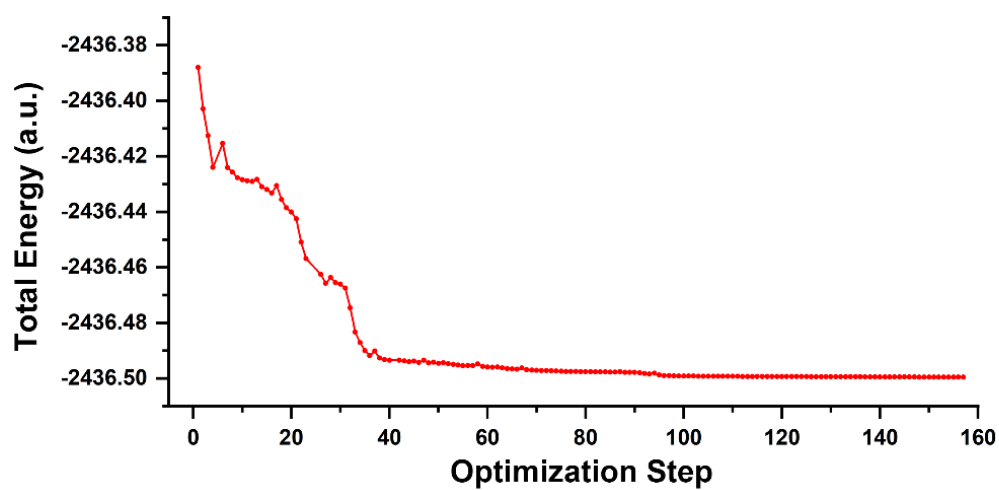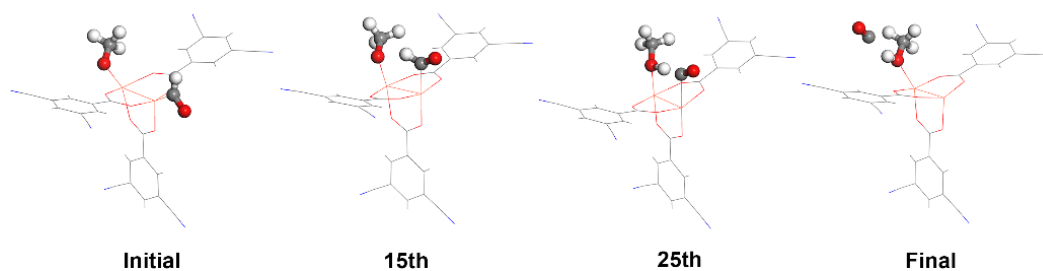

**Fig. S7** (top) Total energy evolution of \*CHO on CH<sub>3</sub>O\_PW during geometry optimization. (bottom) Structures at the initial, 15<sup>th</sup>, 25<sup>th</sup> and final step of optimization.

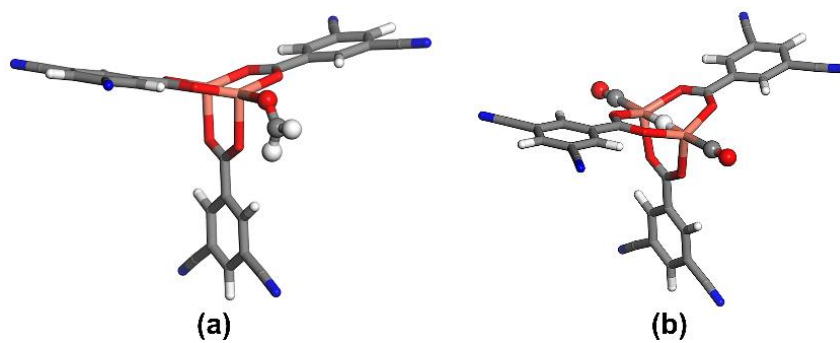

Fig. S8 Structures of (a)  $*\text{OCH}_2$  and (b)  $*\text{CO} + *\text{CO} + *\text{H}$  on  $\text{d\_PW}$ .

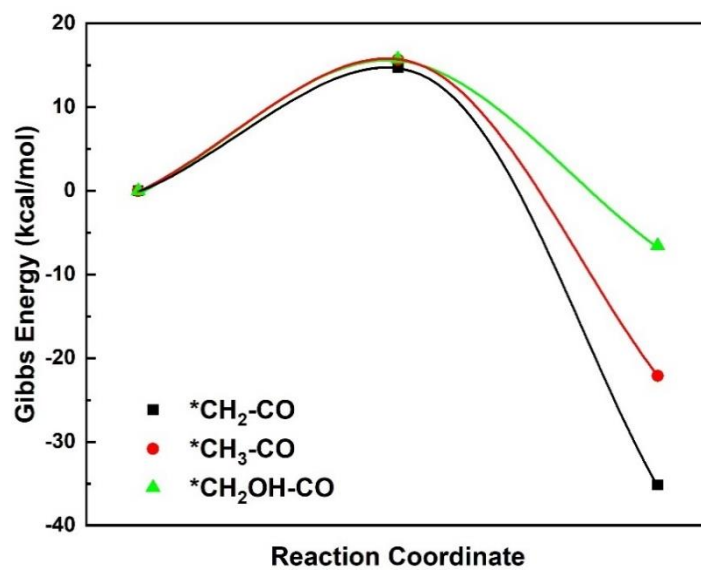

Fig. S9 Gibbs energy profiles for  $*\text{CH}_2\text{-CO}$ ,  $*\text{CH}_3\text{-CO}$  and  $*\text{CH}_2\text{OH-CO}$  coupling on  $\text{d\_PW}$ .
